# Supplementary material for: COVID-19 Outcomes in Patients with Cancer Receiving Immune Checkpoint Inhibitors: A Systematic Review
Source: PubMed Central journal article supplement — J Immunother Precis Oncol. 2023 Feb 22;6(2):103–10. doi: 10.36401/JIPO-22-24 (PMC10195019; doi:10.36401/jipo-22-24), 2023-02-22
Supplement: jipo-06-02-03_s01.pdf [file jipo-06-02-03_s01.pdf]

## SUPPLEMENTAL MATERIAL

**Supplemental Table 1.** Search strategies.

| Line # | Database (platform): MEDLINE (Ovid)                                                                                                                                                                                                                                                       |
|--------|-------------------------------------------------------------------------------------------------------------------------------------------------------------------------------------------------------------------------------------------------------------------------------------------|
| 1      | COVID-19.rx,px,ox. or severe acute respiratory syndrome coronavirus 2.os.                                                                                                                                                                                                                 |
| 2      | ("COVID-19" or COVID19 or "COVID 2019" or "novel coronavirus" or "SARS-CoV" or "SARS-CoV-2" or "SARS2" or "2019-nCoV" or ncov19 or ncov-19 or "2019-novel CoV" or sarscov2 or sarscov-2 or Sars-coronavirus2 or Sars-coronavirus-2 or SARS-like coronavirus* or coronavirus-19).ti,ab,kf. |
| 3      | (coronavirus* or "corona virus*").ti,kf.                                                                                                                                                                                                                                                  |
| 4      | Coronavirus Infections/                                                                                                                                                                                                                                                                   |
| 5      | or/1-4                                                                                                                                                                                                                                                                                    |
| 6      | 20191201:20301231.(dt).                                                                                                                                                                                                                                                                   |
| 7      | 5 and 6 [COVID-19, SARS-COV-2]                                                                                                                                                                                                                                                            |
| 8      | limit 7 to english language                                                                                                                                                                                                                                                               |
| 9      | exp Neoplasms/                                                                                                                                                                                                                                                                            |
| 10     | (cancer* or carcinom* or tumor* or tumour* or neoplas* or malignan* or metasta* or myeloma* or leuk?emia* or lymphoma* or sarcoma* or melanoma* or oncolog*).ti,ab,kf.                                                                                                                    |
| 11     | 9 or 10 [Cancer]                                                                                                                                                                                                                                                                          |
| 12     | 8 and 11                                                                                                                                                                                                                                                                                  |
| 13     | (checkpoint adj3 (inhibitor* or modulator* or antibod* or block*).ti,kf,rn.                                                                                                                                                                                                               |
| 14     | (checkpoint and (inhibitor* or modulator* or antibod* or block*).nm.                                                                                                                                                                                                                      |
| 15     | (checkpoint adj3 (inhibitor* or modulator* or antibod* or block*).ab.                                                                                                                                                                                                                     |
| 16     | ((("cytotoxic T lymphocyte associated" adj3 "4") or "CTLA 4" or CTLA4).ti,kf,rn.                                                                                                                                                                                                          |
| 17     | ("Cytotoxic t-lymphocyte antigen" adj3 "4").ti,kf,rn.                                                                                                                                                                                                                                     |
| 18     | ("Cytotoxic t-lymphocyte antigen" or "cytotoxic T lymphocyte associated").nm.                                                                                                                                                                                                             |
| 19     | (ipilimumab or "MDX CTLA 4" or Yervoy or "MDX 010" or MDX010 or "BMS-734016" or BMS734016).mp.                                                                                                                                                                                            |
| 20     | ("Programmed Cell Death 1" or PD1 or "PD 1").ti,kf,rn,nm.                                                                                                                                                                                                                                 |
| 21     | (pembrolizumab or Keytruda or Lambrolizumab or "Merck 3475" or Merck3475 or "MK 3475" or MK3475 or "Sch 900475" or Sch900475 or "HSDB 8257").mp.                                                                                                                                          |
| 22     | (nivolumab or "BMS 936558" or BMS936558 or "MDX 1106" or MDX1106 or "ONO 4538" or ONO4538 or Opdivo).mp.                                                                                                                                                                                  |
| 23     | ("AMP 514" or AMP514 or MEDI0680 or "MEDI 0680").mp.                                                                                                                                                                                                                                      |
| 24     | ("programmed death ligand 1" or "PD L1" or PDL1 or "B7-H1" or B7HI).ti,kf,rn,nm.                                                                                                                                                                                                          |
| 25     | (atezolizumab or Tecentriq or MPDL3280A or "MPDL 3280A" or RO5541267 or RO-5541267 or RG 7446 or RG7446 or "CD274 ANTIGEN" or "CD274 protein").mp.                                                                                                                                        |
| 26     | (durvalumab or imfinzi or "MEDI 4736" or MEDI4736).mp.                                                                                                                                                                                                                                    |
| 27     | (avelumab or Bavencio or MSB0010718C or "MSB 0010718C" or MSB0010682).mp.                                                                                                                                                                                                                 |
| 28     | ("BMS 936559" or BMS936559 or MDX1105 or "MDX 1105").mp.                                                                                                                                                                                                                                  |

|               |                                                                                                                                                                                                                                                                                           |
|---------------|-------------------------------------------------------------------------------------------------------------------------------------------------------------------------------------------------------------------------------------------------------------------------------------------|
| 29            | (Cemiplimab or libtayo or REGN2810 or "REGN 2810").mp.                                                                                                                                                                                                                                    |
| 30            | or/13-29                                                                                                                                                                                                                                                                                  |
| 31            | 12 and 30 [COVID-19 + cancer patients + immunotherapy (checkpoint inhibitors)]                                                                                                                                                                                                            |
| <b>Line #</b> | <b>Database (Platform): Embase (Ovid)</b>                                                                                                                                                                                                                                                 |
| 1             | ("COVID-19" or COVID19 or "COVID 2019" or "novel coronavirus" or "SARS-CoV" or "SARS-CoV-2" or "SARS2" or "2019-nCoV" or ncov19 or ncov-19 or "2019-novel CoV" or sarscov2 or sarscov-2 or Sars-coronavirus2 or Sars-coronavirus-2 or SARS-like coronavirus* or coronavirus-19).ti,ab,kw. |
| 2             | (coronavirus* or "corona virus*").ti.                                                                                                                                                                                                                                                     |
| 3             | severe acute respiratory syndrome/                                                                                                                                                                                                                                                        |
| 4             | coronavirus infection/                                                                                                                                                                                                                                                                    |
| 5             | "coronavirus disease 2019"/                                                                                                                                                                                                                                                               |
| 6             | or/1-5                                                                                                                                                                                                                                                                                    |
| 7             | limit 6 to english language                                                                                                                                                                                                                                                               |
| 8             | limit 7 to dc=20191201-20221231                                                                                                                                                                                                                                                           |
| 9             | exp malignant neoplasm/                                                                                                                                                                                                                                                                   |
| 10            | (cancer* or neoplas* or tumo?r* or leuk?emia* or lymphoma* or melanoma* or carcinoma* or sarcoma* or oncolog*).ti,ab,kw.                                                                                                                                                                  |
| 11            | 9 or 10                                                                                                                                                                                                                                                                                   |
| 12            | 8 and 11                                                                                                                                                                                                                                                                                  |
| 13            | (immun* adj3 checkpoint adj3 (inhibitor* or modulator* or antibod* or block*).ti,hw,kw.                                                                                                                                                                                                   |
| 14            | ((("cytotoxic T lymphocyte associated" adj3 "4") or "CTLA 4" or CTLA4).ti,kw,hw.                                                                                                                                                                                                          |
| 15            | ("Cytotoxic t-lymphocyte antigen" adj3 "4").ti,kw,hw.                                                                                                                                                                                                                                     |
| 16            | (ipilimumab or "MDX CTLA 4" or Yervoy or "MDX 010" or MDX010 or "BMS-734016" or BMS734016).ti,ab,hw,kw,du,tn.                                                                                                                                                                             |
| 17            | ("Programmed Cell Death 1" or PD1 or "PD 1").ti,kw,hw,du,tn.                                                                                                                                                                                                                              |
| 18            | (pembrolizumab or Keytruda or Lambrolizumab or "Merck 3475" or Merck3475 or "MK 3475" or MK3475 or "Sch 900475" or Sch900475 or "HSDB 8257").ti,ab,kw,hw,du,tn.                                                                                                                           |
| 19            | (nivolumab or "BMS 936558" or BMS936558 or "MDX 1106" or MDX1106 or "ONO 4538" or ONO4538 or Opdivo).ti,ab,kw,hw,du,tn.                                                                                                                                                                   |
| 20            | ("programmed death ligand 1" or "PD L1" or PDL1 or "B7-H1" or B7HI).ti,kw,hw.                                                                                                                                                                                                             |
| 21            | (atezolizumab or Tecentriq or MPDL3280A or "MPDL 3280A" or RO5541267 or RO-5541267 or RG 7446 or RG7446 or "CD274 ANTIGEN" or "CD274 protein").ti,ab,kw,hw,du,tn.                                                                                                                         |
| 22            | (avelumab or Bavencio or MSB0010718C or "MSB 0010718C" or MSB0010682).ti,ab,kw,hw,du,tn.                                                                                                                                                                                                  |
| 23            | (Cemiplimab or libtayo or REGN2810 or "REGN 2810").ti,ab,kw,hw,du,tn.                                                                                                                                                                                                                     |
| 24            | (durvalumab or imfinzi or "MEDI 4736" or MEDI4736).ti,ab,kw,hw,du,tn.                                                                                                                                                                                                                     |
| 25            | or/13-24                                                                                                                                                                                                                                                                                  |
| 26            | 12 and 25                                                                                                                                                                                                                                                                                 |

**Supplemental Table 2.** Characteristics of the participants included in the studies

| Study ID                     | Country | Age                     | Cancer types                                                                                                                        | Types of ICI                      | Interval between last ICI dose and COVID-19 diagnosis | Funding |
|------------------------------|---------|-------------------------|-------------------------------------------------------------------------------------------------------------------------------------|-----------------------------------|-------------------------------------------------------|---------|
| <b>Prospective cohorts</b>   |         |                         |                                                                                                                                     |                                   |                                                       |         |
| Mandala 2021 <sup>22</sup>   | Italy   | 66.5 mean (SD 12.1)     | melanoma, lung, renal cell carcinoma                                                                                                | anti-PD-1, anti-PD-L1, anti-CTLA4 | median 23.5 (IQR 14-42) days                          | None    |
| Nichetti 2020 <sup>25</sup>  | Italy   | 62 median (IQR 54.5-71) | breast, colorectal, gastric, head and neck, lung, melanoma, pancreatic, prostate, renal, sarcoma, urothelial, neuroendocrine        | pembrolizumab<br>nivolumab        | median 50 days                                        | None    |
| Yarza 2020 <sup>32</sup>     | Spain   | 66                      | kidney, lung, colorectal, upper gastrointestinal, bladder, breast, gynecological, prostate, thyroid, head and neck, sarcoma.        | NR                                | within 28 days                                        | None    |
| <b>Retrospective cohorts</b> |         |                         |                                                                                                                                     |                                   |                                                       |         |
| Albiges 2020 <sup>10</sup>   | France  | 61 median (IQR 52-71)   | breast, gynecological, head and neck, gastrointestinal, genitourinary, thoracic, dermatology, others. Mature B cell neoplasm, acute | NR                                | within 90 days                                        | NR      |

|                                 |               |                          |                                                                                                                                                                                                                                                                           |                       |                             |                                                                                                                                                                                                                                                                                                                                                                                                |
|---------------------------------|---------------|--------------------------|---------------------------------------------------------------------------------------------------------------------------------------------------------------------------------------------------------------------------------------------------------------------------|-----------------------|-----------------------------|------------------------------------------------------------------------------------------------------------------------------------------------------------------------------------------------------------------------------------------------------------------------------------------------------------------------------------------------------------------------------------------------|
|                                 |               |                          | myeloid leukemia, Hodgkin lymphoma.                                                                                                                                                                                                                                       |                       |                             |                                                                                                                                                                                                                                                                                                                                                                                                |
| Assaad 2020 <sup>9</sup>        | France        | 63.8 mean (SD 2.2)       | breast, colorectal, soft tissue sarcomas, renal cell carcinoma, pancreas, uterine, bone, peritoneal, esophagus, adrenal, anal carcinoma, ovarian, prostate, testis adenocarcinoma, glioma, duodenum, parotid, maxillary sinuses, supraglottis, thymoma, bladder carcinoma | anti-PD-1, anti-PD-L1 | within 30 days              | NetSARC (INCA & DGOS) and RREPS (INCA & DGOS), RESOS (INCA & DGOS) and LYRICAN (INCA-DGOS-INSERM 12563), Institut Convergence PLASCAN (17-CONV-0002), Association DAM's, Ensemble contre Le GIST, Eurosarc (FP7-278,742), la Fondation ARC, Infosarcome, InterSARC (INCA), LabEx DEvweCAN (ANR-10-LABX-0061), Ligue de L'Ain contre le Cancer, La Ligue contre le Cancer, EURACAN (EC 739,521) |
| Dai 2020 <sup>12</sup>          | United States | 64 median                | lung, gastrointestinal, breast, thyroid, blood cancer, cervix, esophagus                                                                                                                                                                                                  | anti-PD-1             | within 40 days              | None                                                                                                                                                                                                                                                                                                                                                                                           |
| Garassino 2020 <sup>13</sup>    | Italy         | 68 median (IQR 61.8-75)  | thoracic malignancy                                                                                                                                                                                                                                                       | NR                    | within 60 days              | None                                                                                                                                                                                                                                                                                                                                                                                           |
| Gonzalez-Cao 2020 <sup>23</sup> | Spain         | 69 median (range 6 - 94) | melanoma                                                                                                                                                                                                                                                                  | anti-PD-1             | undergoing cancer treatment | NR                                                                                                                                                                                                                                                                                                                                                                                             |
| Grivas 2021 <sup>14</sup>       | United States | 70 median (IQR 60-79)    | breast, prostate, thoracic, lower gastrointestinal, genitourinary, gynecological, upper gastrointestinal,                                                                                                                                                                 | NR                    | within 90 days              | Vanderbilt Institute for Clinical and <u>Translational Research</u> grant support                                                                                                                                                                                                                                                                                                              |

|                             |               |                         |                                                                                                                             |                                                                                      |                |      |
|-----------------------------|---------------|-------------------------|-----------------------------------------------------------------------------------------------------------------------------|--------------------------------------------------------------------------------------|----------------|------|
|                             |               |                         | endocrine, skin cancer, head and neck, sarcoma, nervous system, lymphoid neoplasms, multiple myeloma, myeloid neoplasm      |                                                                                      |                |      |
| Gulati 2021 <sup>15</sup>   | United States | 66                      | NR                                                                                                                          | anti-PD-1, anti-PD-L1, anti-CTLA4                                                    | within 1 year  | NIH  |
| Hwang 2021 <sup>16</sup>    | United States | 66 median (IQR 55-75)   | hematological, breast, genitourinary, lung, gastrointestinal, abdominal, gynecological, CNS and brain, skin, head and neck, | NR                                                                                   | within 30 days | None |
| Jee 2021 <sup>17</sup>      | United States | NR                      | breast, colorectal, renal, bladder, melanoma, cervical, uterine, esophageal, stomach, hepatocellular carcinoma.             | anti-PD-1, anti-PDL1, anti-CTLA4                                                     | within 90 days | NIH  |
| Klebanov 2021 <sup>18</sup> | United States | 66.6 mean (SD 12)       | hematological, solid                                                                                                        | pembrolizumab, nivolumab, atezolizumab, ipilimumab, cemiplimab, avelumab, durvalumab | NR             | NR   |
| Lara 2020 <sup>19</sup>     | United States | 64 median (IQR 51-73)   | gynecological                                                                                                               | pembrolizumab, nivolumab, NC318                                                      | within 50 days | NIH  |
| Lin 2021 <sup>20</sup>      | United States | 65 median (range 31-94) | breast, gynecological, gastrointestinal, lung, head and neck, genitourinary, brain, osteosarcoma, hematological             | atezolizumab, durvalumab, pembrolizumab, nivolumab                                   | within 30 days | NR   |

|                                |                |                         |                                                                                              |                                                                                                  |                             |      |
|--------------------------------|----------------|-------------------------|----------------------------------------------------------------------------------------------|--------------------------------------------------------------------------------------------------|-----------------------------|------|
| Luo 2020 <sup>21</sup>         | United States  | 68 median (IQR 61-75)   | lung                                                                                         | anti-PD-1                                                                                        | within 45 days              | NR   |
| Moritz 2021 <sup>38</sup>      | Germany        | 65 median (IQR 26-88)   | melanoma                                                                                     | anti-PD-1                                                                                        | median 17 days (range 0-51) | None |
| Pinato 2020 <sup>26</sup>      | United Kingdom | 68 mean (SD 12.8)       | head and neck, lung, gastrointestinal, breast, gynecologic, genitourinary, lymphoma/leukemia | NR                                                                                               | mean 19.3 days (SD 33.3)    | None |
| Robilotti 2020 <sup>7</sup>    | United States  | 60                      | leukemia, lymphoma, myeloma, breast, colorectal, lung, prostate                              | pembrolizumab, nivolumab, atezolizumab, avelumab, durvalumab, ipilimumab, nivolumab + ipilimumab | within 90 days              | NR   |
| Trojaniello 2021 <sup>39</sup> | Italy          | NR                      | skin cancer                                                                                  | cemiplimab, nivolumab, pembrolizumab, ipilimumab                                                 | undergoing ICI treatment    | None |
| Tyan 2020 <sup>31</sup>        | United States  | 72 median (range 45-83) | thoracic, melanoma and non-melanoma skin cancer, gastrointestinal, hematologic               | atezolizumab, durvalumab, pembrolizumab, nivolumab, ipilimumab                                   | median 29 days              | NR   |

**Case reports**

|                                  |             |             |                         |                                            |                          |                                       |
|----------------------------------|-------------|-------------|-------------------------|--------------------------------------------|--------------------------|---------------------------------------|
| Buyansky 2021 <sup>11</sup>      | Canada      | 62          | squamous cell carcinoma | durvalumab                                 | 10 days                  | Fonds de Recherche du Québec en Santé |
| Ramos-Ruperto 2021 <sup>27</sup> | Switzerland | 76          | lung cancer             | pembrolizumab                              | undergoing ICI treatment | NR                                    |
| Rolfo 2020 <sup>28</sup>         | Colombia    | 1. 62 2. 58 | lung                    | 1. ipilimumab + nivolumab 2. pembrolizumab | 2 days                   | NR                                    |
| Serra-Garcia 2021 <sup>29</sup>  | Spain       | 48          | basal cell carcinoma    | cemiplimab                                 | NR                       | None                                  |

NR = not reported; NA = not applicable; ICI = immune checkpoint inhibitor; IQR = interquartile range; SD = standard deviation; anti-PD-1= programmed cell death protein 1 inhibitors; anti-PD-L1= programmed death-ligand 1 inhibitors; anti-CTLA4 = cytotoxic T lymphocyte-associated protein 4 inhibitor

**Supplemental Table 3.** Risk of bias of cohort studies. Newcastle Ottawa Scale

| Author            | Selection                                   |                                        |                                  |                                                                                                         | Comparability                                     |                                      | Outcome                      |                         |                               | Total quality score |
|-------------------|---------------------------------------------|----------------------------------------|----------------------------------|---------------------------------------------------------------------------------------------------------|---------------------------------------------------|--------------------------------------|------------------------------|-------------------------|-------------------------------|---------------------|
|                   | <i>Representativeness of exposed cohort</i> | <i>Selection of non-exposed cohort</i> | <i>Ascertainment of exposure</i> | <i>Demonstration that outcome of interest was not present at start of study, OR baseline assessment</i> | <i>Adjust for the most important risk factors</i> | <i>Adjust for other risk factors</i> | <i>Assessment of outcome</i> | <i>Follow-up length</i> | <i>Loss to follow-up rate</i> |                     |
| Albiges 2020      | ☆                                           | ☆                                      | ☆                                | ☆                                                                                                       | ☆                                                 |                                      |                              | ☆                       | ☆                             | 7                   |
| Assaad 2020       | ☆                                           | ☆                                      | ☆                                | ☆                                                                                                       | ☆                                                 | ☆                                    |                              | ☆                       | ☆                             | 8                   |
| Dai 2020          | ☆                                           | ☆                                      | ☆                                | ☆                                                                                                       | ☆                                                 | ☆                                    |                              | ☆                       | ☆                             | 8                   |
| Garassino 2020    | ☆                                           | ☆                                      | ☆                                | ☆                                                                                                       | ☆                                                 |                                      | ☆                            | ☆                       | ☆                             | 8                   |
| Gonzalez-Cao 2020 | ☆                                           | ☆                                      | ☆                                |                                                                                                         |                                                   |                                      | ☆                            | ☆                       | ☆                             | 6                   |
| Grivas 2021       | ☆                                           | ☆                                      |                                  | ☆                                                                                                       | ☆                                                 | ☆                                    | ☆                            | ☆                       |                               | 7                   |
| Gulati 2021       | ☆                                           | ☆                                      | ☆                                | ☆                                                                                                       |                                                   |                                      |                              | ☆                       | ☆                             | 6                   |
| Hwang 2021        | ☆                                           | ☆                                      | ☆                                | ☆                                                                                                       | ☆                                                 | ☆                                    | ☆                            | ☆                       | ☆                             | 9                   |
| Jee 2021          | ☆                                           | ☆                                      | ☆                                | ☆                                                                                                       |                                                   |                                      |                              | ☆                       | ☆                             | 6                   |
| Klebanov 2021     |                                             |                                        | ☆                                | ☆                                                                                                       | ☆                                                 |                                      |                              |                         | ☆                             | 4                   |
| Lara 2020         | ☆                                           | ☆                                      | ☆                                |                                                                                                         | ☆                                                 |                                      | ☆                            | ☆                       | ☆                             | 7                   |
| Lin 2021          | ☆                                           | ☆                                      | ☆                                |                                                                                                         | ☆                                                 | ☆                                    | ☆                            | ☆                       | ☆                             | 8                   |
| Luo 2020          | ☆                                           | ☆                                      | ☆                                | ☆                                                                                                       |                                                   |                                      | ☆                            |                         | ☆                             | 6                   |
| Mandala 2021      | ☆                                           | ☆                                      | ☆                                | ☆                                                                                                       |                                                   |                                      | ☆                            | ☆                       | ☆                             | 7                   |
| Moritz 2021       | ☆                                           |                                        | ☆                                |                                                                                                         |                                                   |                                      | ☆                            |                         | ☆                             | 4                   |
| Nichetti 2020     | ☆                                           | ☆                                      | ☆                                | ☆                                                                                                       |                                                   |                                      | ☆                            | ☆                       | ☆                             | 7                   |
| Pinato 2020       | ☆                                           |                                        | ☆                                |                                                                                                         | ☆                                                 |                                      |                              | ☆                       | ☆                             | 5                   |
| Robilotti 2020    | ☆                                           | ☆                                      | ☆                                | ☆                                                                                                       | ☆                                                 |                                      | ☆                            | ☆                       | ☆                             | 8                   |
| Trojaniello 2021  | ☆                                           |                                        | ☆                                | ☆                                                                                                       |                                                   |                                      | ☆                            |                         | ☆                             | 5                   |
| Tyan 2020         | ☆                                           | ☆                                      |                                  |                                                                                                         | ☆                                                 |                                      | ☆                            | ☆                       | ☆                             | 6                   |
| Yarza 2020        | ☆                                           | ☆                                      | ☆                                | ☆                                                                                                       | ☆                                                 | ☆                                    | ☆                            | ☆                       | ☆                             | 9                   |



**Supplemental Table 4.** Results of individual cohort studies

| Study ID                        | Outcome                      | ICI events/total (%) | Chemotherapy events/total (%) | ICI + chemotherapy events/total (%) | Targeted therapy events/total (%) | No treatment events/total (%) | Hormone therapy events/total (%) | No ICI treatment events/total (%) | Adjusted analysis OR (CI95%) |
|---------------------------------|------------------------------|----------------------|-------------------------------|-------------------------------------|-----------------------------------|-------------------------------|----------------------------------|-----------------------------------|------------------------------|
| Albiges 2020 <sup>10</sup>      | Clinical Worsening           | 3/19 (16.8)          | 26/66 (39.4)                  | -                                   | 7/30 (23.3)                       | -                             | -                                | -                                 | NR                           |
|                                 | Mortality                    | 3/19 (16.8)          | 18/66 (27.3)                  | -                                   | 2/30 (6.7)                        | -                             | -                                | -                                 | NR                           |
| Assaad 2020 <sup>9</sup>        | Mortality                    | 0/3 (0)              | 0/16 (0)                      | -                                   | -                                 | 5/26 (19.2)                   | -                                | -                                 | NR                           |
| Dai 2020 <sup>12</sup>          | Mortality                    | 2/6 (33.3)           | 1/12 (8.3)                    | 1/3 (33.3)                          | 0/4 (0)                           | -                             | -                                | -                                 | NR                           |
|                                 | Severe COVID-19              | 4/6 (66.7)           | -                             | -                                   | -                                 | -                             | -                                | -                                 | NR                           |
|                                 | ICU admission                | -                    | -                             | -                                   | -                                 | -                             | -                                | -                                 | NR                           |
| Garassino 2020 <sup>13</sup>    | Hospital admission           | 26/34 (76.5)         | 35/48 (72.9)                  | 16/20 (80)                          | 17/28 (60.7)                      | 42/52 (80.8)                  | -                                | -                                 | NR                           |
|                                 | Mortality                    | 11/33 (33.3)         | 22/46 (47.8)                  | -                                   | 8/28 (28.6)                       | 13/49 (26.5)                  | -                                | -                                 | NR                           |
| Gonzalez-Cao 2020 <sup>14</sup> | Mortality                    | 3/22 (13.6)          | -                             | -                                   | 2/16 (12.5)                       | 4/12 (33.3)                   | -                                | -                                 | NR                           |
| Grivas 2021 <sup>14</sup>       | Mortality                    | 39/248 (15.7)        | 144/802 (18)                  | -                                   | 104/693 (15)                      | 374/2807 (13.3)               | 47/483 (9.7)                     | -                                 | 0.91 (0.56-1.47)             |
|                                 | ICU Admission                | 15/248 (6)           | 29/802 (3.6)                  | -                                   | 34/693 (4.9)                      | 142/2807 (5.1)                | 20/483 (4.1)                     | -                                 | NR                           |
|                                 | Hospital Admission           | 75/248 (30.2)        | 293/802 (36.5)                | -                                   | 243/693 (35.1)                    | 953/2807 (34)                 | 149/483 (30.8)                   | -                                 | NR                           |
|                                 | Mechanical ventilation       | 11/248 (4.4)         | 31/802 (3.9)                  | -                                   | 48/693 (6.9)                      | 167/2807 (5.9)                | 24/483 (5)                       | -                                 | NR                           |
|                                 | Severe COVID-19              | -                    | -                             | -                                   | -                                 | -                             | -                                | -                                 | 0.86 (0.64-1.16)             |
| Gulati 2021 <sup>15</sup>       | Venous thromboembolism (VTE) | 23/199 (11.6)        | -                             | -                                   | 62/675 (9.2)                      | -                             | 26/363 (7.2)                     | -                                 | NR                           |

|                             |                              |                                          |                                         |              |              |                 |           |               |                  |
|-----------------------------|------------------------------|------------------------------------------|-----------------------------------------|--------------|--------------|-----------------|-----------|---------------|------------------|
| Hwang 2021 <sup>16</sup>    | Mortality                    | 6/12 (50)                                | 12/39 (30.8)                            | -            | 12/63 (19)   | 152/1175 (12.9) | -         | -             | 5.22 (1.2-22.3)* |
| Jee 2021 <sup>17</sup>      | Respiratory failure or death | 14/51 (27.5)                             | 14/38 (36.8)                            | -            | -            | -               | -         | -             | NR               |
| Klebanov 2021 <sup>18</sup> | COVID-19 infection           | 22/1545 (1.4)                            | -                                       | -            | -            | -               | -         | 213/20418 (1) | 1.38 (0.89-2.13) |
|                             | Mortality                    | 9/22 (40.9)                              | -                                       | -            | -            | -               | -         | 61/213 (28.6) | 1.60 (0.78-3.29) |
| Lara 2020 <sup>19</sup>     | Severe COVID-19              | 3/8 (37.5)                               | 6/35 (17.1)                             | -            | 2/13 (15.4)  | -               | 0/9 (0)   | -             | NR               |
| Lin 2021 <sup>20</sup>      | Hospital Admission           | 5/10 (50)                                | 16/35 (45.7)                            | -            | -            | -               | -         | -             | NR               |
| Luo 2020 <sup>21</sup>      | Hospital Admission           | 18/26 (69.2)                             | 18/26 (69.2)                            | 12/14 (85.7) | 7/10 (70)    | -               | -         | -             | 1.20 (0.33-4.23) |
|                             | ICU/Intubation/DNI           | 7/26 (26.9)                              | 11/26 (42.3)                            | 6/14 (42.9)  | 5/10 (50)    | -               | -         | -             | 0.83 (0.24-2.82) |
|                             | Mortality                    | 5/26 (19.2)                              | 9/26 (34.6)                             | 4/14 (28.6)  | 1/10 (10)    | -               | -         | -             | 1.13 (0.25-5.03) |
| Mandala 2021 <sup>22</sup>  | COVID-19 infection           | 52/159 (32.7)                            | 13/50 (26)                              | -            | 24/84 (28.6) | -               | -         | -             | NR               |
|                             | Hospital admission           | 7/52 (13.5)                              | 1/13 (7.7)                              | -            | -            | -               | -         | -             | NR               |
|                             | Mortality                    | 6/52 (11.5)                              | 2/13 (15.4)                             | -            | -            | -               | -         | -             | NR               |
|                             | Serious adverse events       | 9/52 (17.3)<br>4/107 (3.7) no SARS-CoV-2 | 2/13 (15.4)<br>1/37 (2.7) no SARS-CoV-2 | -            | -            | -               | -         | -             | NR               |
| Moritz 2021 <sup>38</sup>   | Mortality                    | 0/13 (0)                                 | -                                       | -            | -            | -               | -         | -             | NR               |
|                             | ICU Admission                | 2/13 (15.4)                              | -                                       | -            | -            | -               | -         | -             | NR               |
|                             | COVID-19 infection           | 13/652 (2)                               | -                                       | -            | -            | -               | -         | -             | NR               |
|                             | irAEs                        | 0/13 (0)                                 | -                                       | -            | -            | -               | -         | -             | NR               |
|                             | Mortality                    | 2/4 (50)                                 | 2/5 (40)                                | -            | -            | -               | 2/2 (100) | -             | NR               |

|                                |                            |             |              |   |            |   |            |              |                       |
|--------------------------------|----------------------------|-------------|--------------|---|------------|---|------------|--------------|-----------------------|
| Nichetti 2020 <sup>25</sup>    | COVID-19 infection         | 4/493 (493) | -            | - | -          | - | -          | 7/822 (0.85) | NR                    |
| Pinato 2020 <sup>26</sup>      | Mortality                  | NA          | -            | - | -          | - | -          | -            | HR 0.80 (0.46-1.40)** |
| Robilotti 2020 <sup>7</sup>    | Hospital admission         | -           | -            | - | -          | - | -          | -            | 2.66 (1.05-6.54)      |
|                                | Severe respiratory illness | -           | -            | - | -          | - | -          | -            | 2.22 (1.06-4.65)      |
| Trojaniello 2021 <sup>39</sup> | Severe COVID-19            | 1/17 (5.9)  | -            | - | -          | - | -          | -            | NR                    |
|                                | irAEs                      | 0/17 (0)    |              |   |            |   |            |              |                       |
| Tyan 2020 <sup>31</sup>        | Mortality                  | 7/25 (28)   | -            | - | -          | - | -          | 9/25 (36)    | 0.36 (0.07-1.87)      |
|                                | Hospital admission         | 19/25 (76)  | -            | - | -          | - | -          | 24/25 (96)   | NR                    |
|                                | ICU admission              | 5/25 (20)   | -            | - | -          | - | -          | 10/25 (40)   | NR                    |
| Yarza 2020 <sup>32</sup>       | Respiratory failure        | 4/8 (50)    | 19/36 (52.8) | - | 2/7 (28.6) | - | 6/7 (85.7) | -            | NR                    |
|                                | ARDS                       | 3/8 (37.5)  | 7/36 (19.4)  | - | 1/7 (14.3) | - | 4/7 (57.1) | -            | NR                    |
|                                | Mortality                  | -           | -            | - | -          | - | -          | -            | 0.15 (0.01-1.65)      |

ICU = intensive care unit; ARDS: acute respiratory distress syndrome; DNI = do not intubate; NR = not reported; irAE = immune related adverse event; HR = hazard ratio; CI = confidence interval

\*The comparison group was cancer patients without treatment

\*\*univariable analysis

## FOREST PLOT

Supplemental Figure 1. Comparison ICI versus no cancer treatment

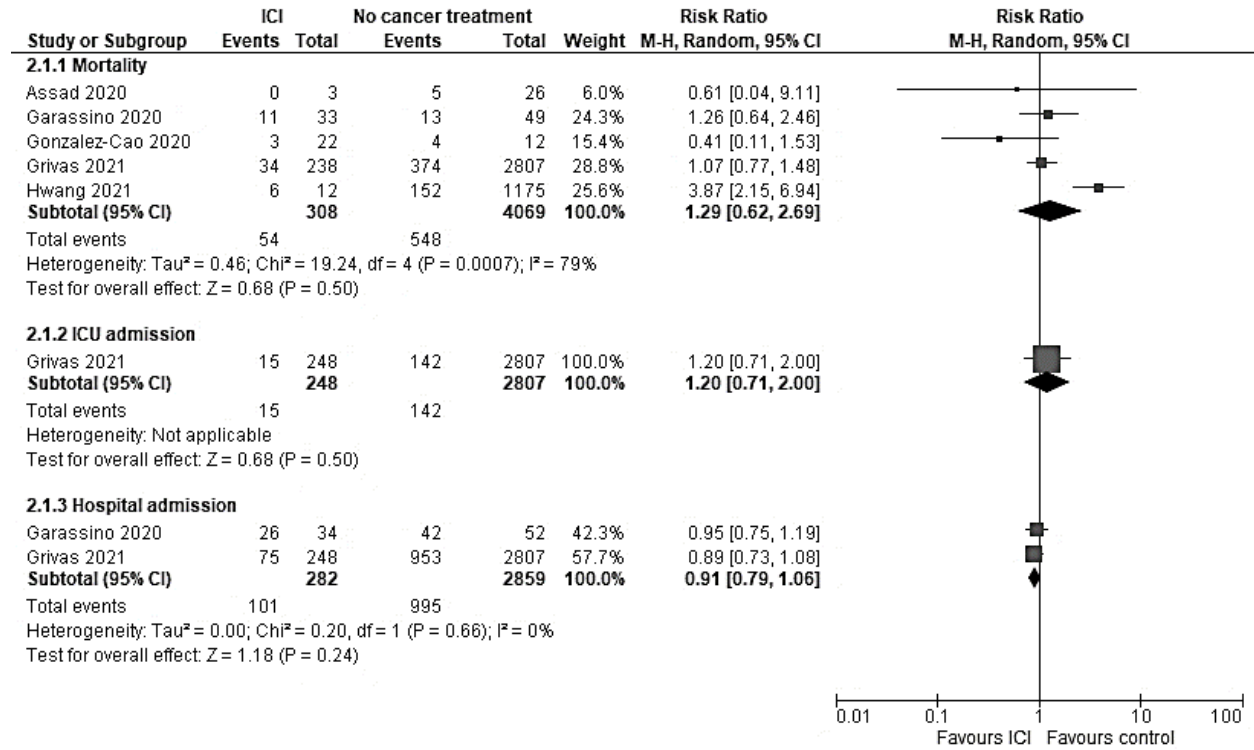

ICI= immune checkpoint inhibitor

Supplemental Figure 2. Comparison ICI versus chemotherapy

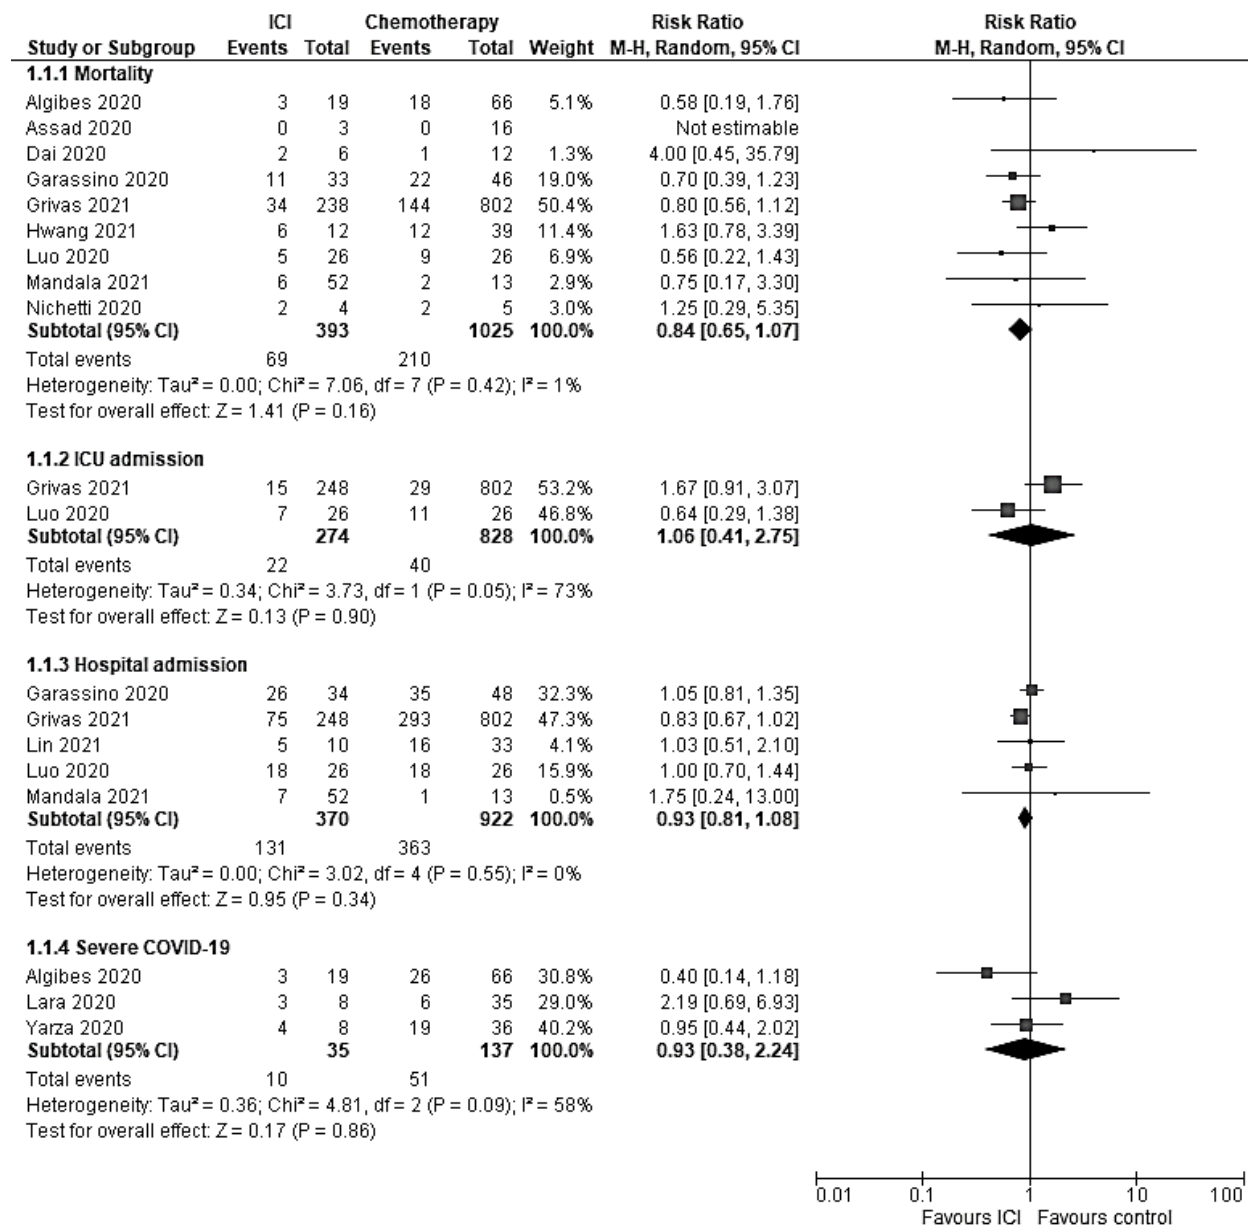

ICI= immune checkpoint inhibitor

Supplemental Figure 3. Comparison ICI versus targeted therapy

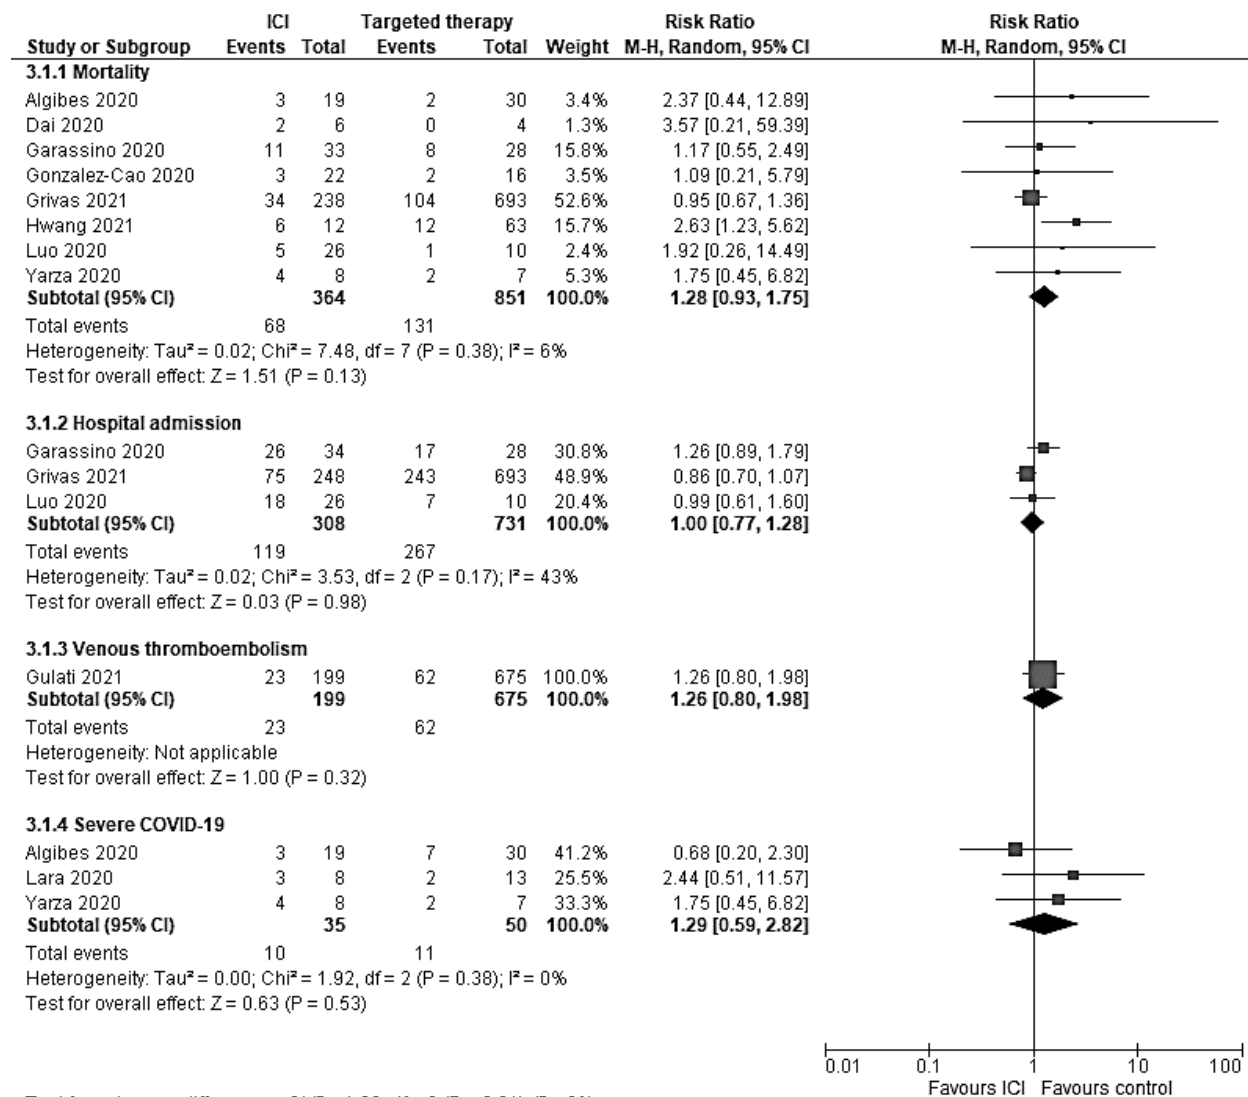

ICI= immune checkpoint inhibitor

Supplemental Figure 4. Comparison ICI versus no ICI. aOR

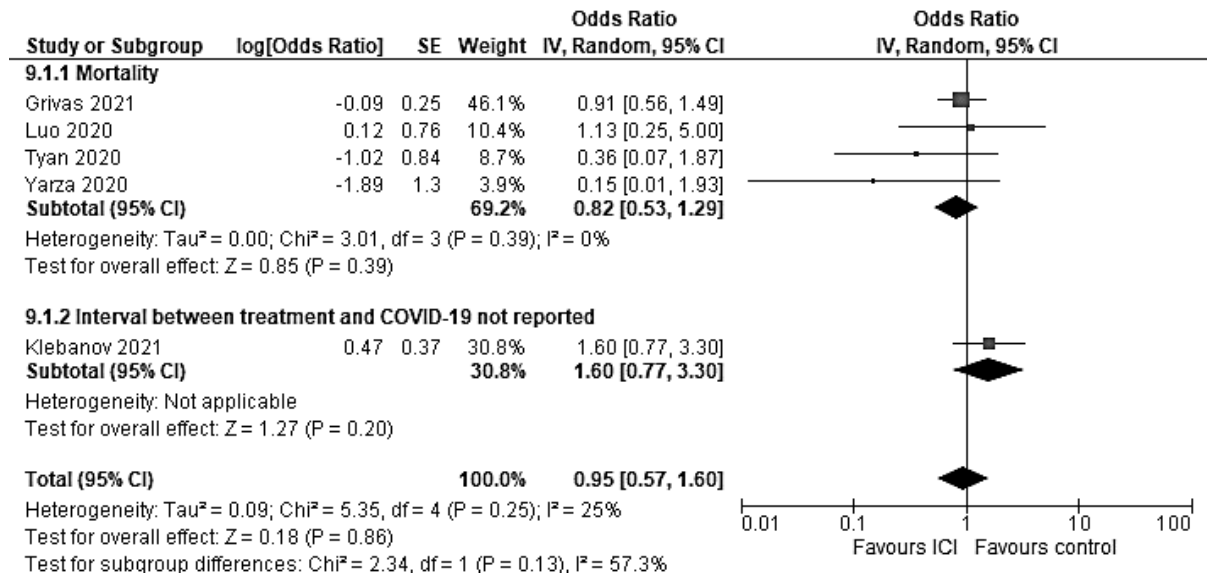

ICI=immune checkpoint inhibitor; aOR=adjusted odds ratio

Supplemental Figure 5.a. Comparison ICI versus hormone therapy. Metanalysis using random effects model

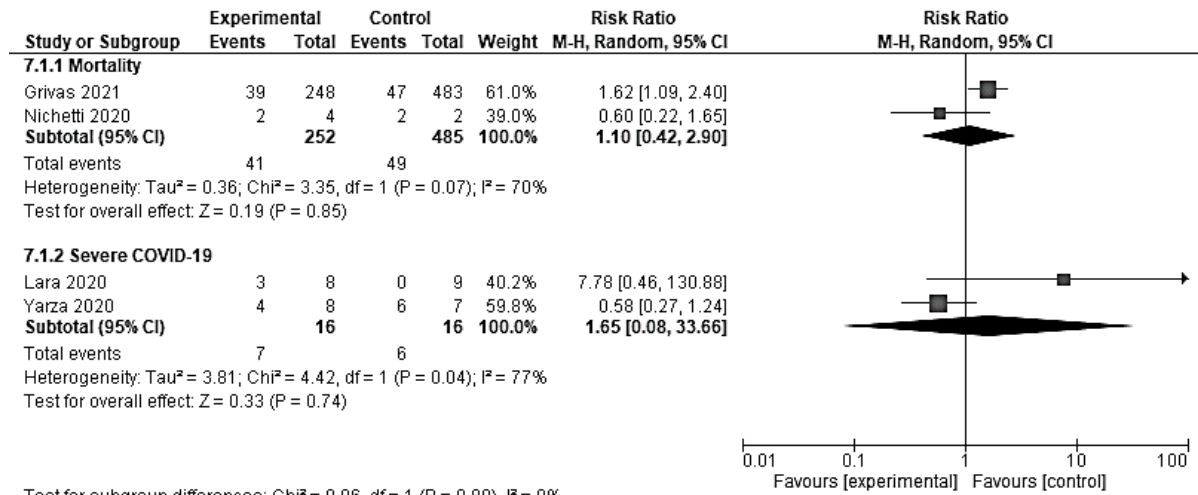

ICI= immune checkpoint inhibitor



Supplemental Figure 5.b. Comparison ICI versus hormone therapy. Metanalysis using fixed effects model

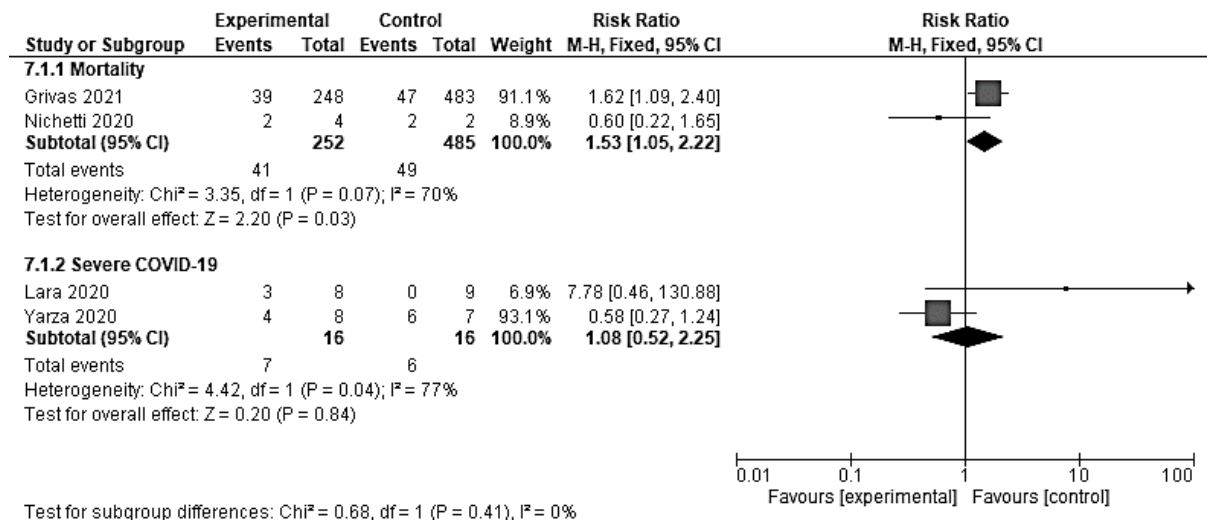

ICI= immune checkpoint inhibitor

Supplemental Figure 6.a. Comparison ICI versus chemotherapy + ICI. Metanalysis using random effects model

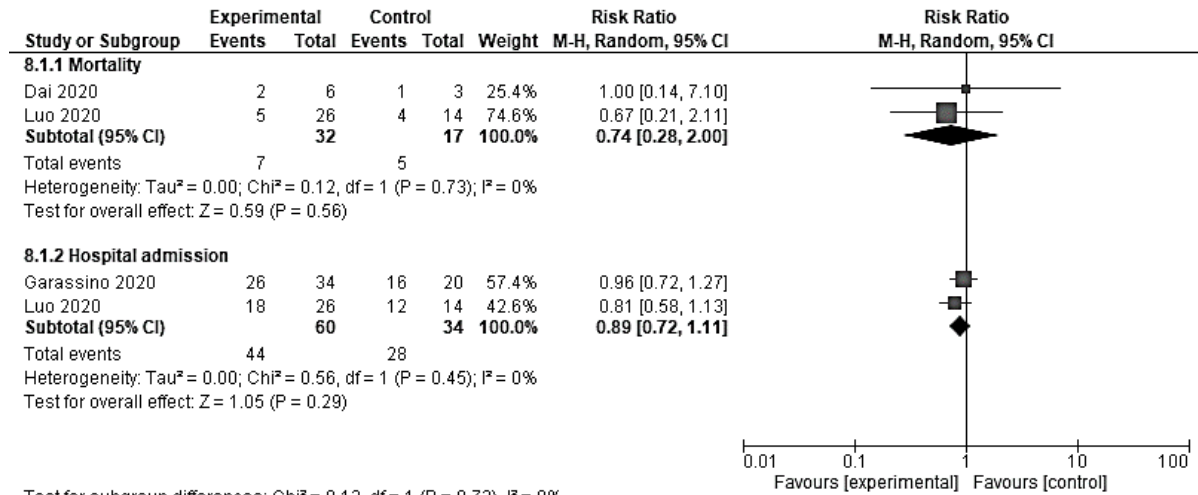

ICI= immune checkpoint inhibitor

Supplemental Figure 6.b. Comparison ICI versus chemotherapy + ICI. Metanalysis using fixed effects model

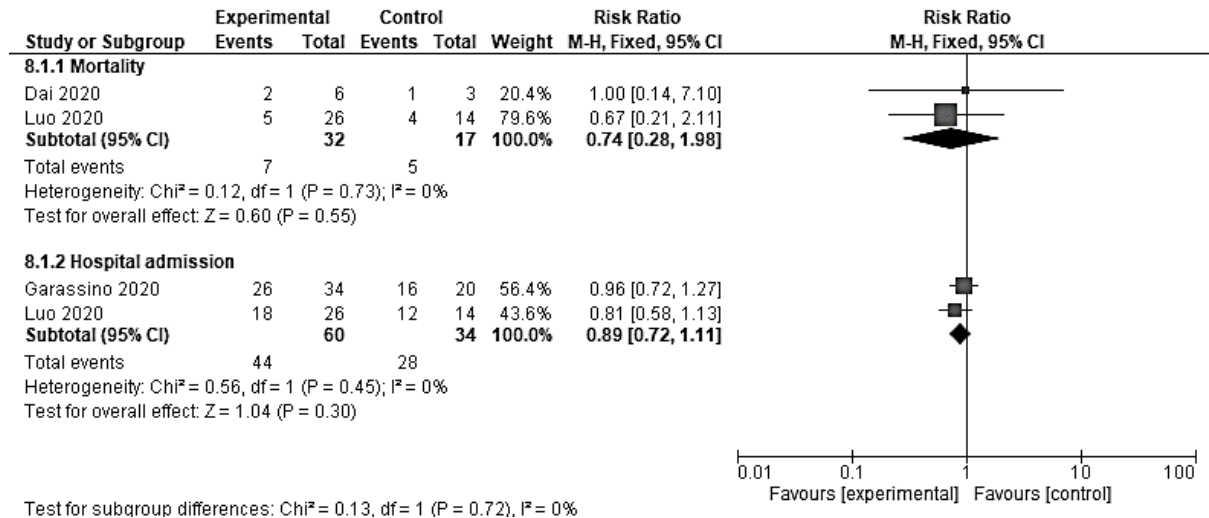

ICI= immune checkpoint inhibitor

## Sensitivity analysis excluding studies with high risk of bias for the outcome mortality

Supplemental Figure 7. Comparison ICI versus no cancer treatment

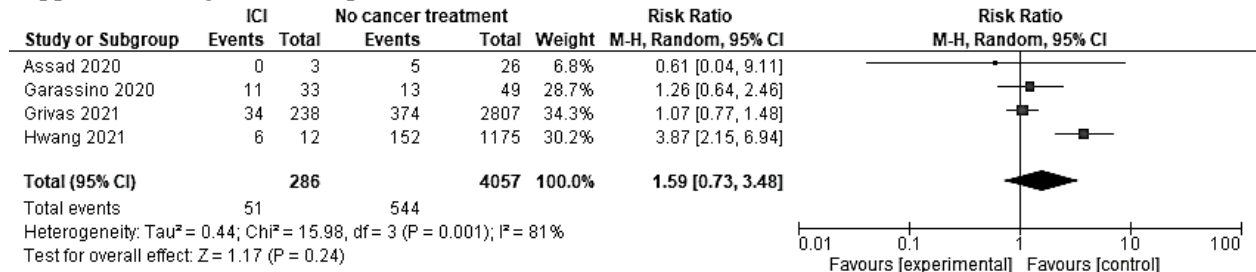

ICI= immune checkpoint inhibitor

Supplemental Figure 8. Comparison ICI versus chemotherapy

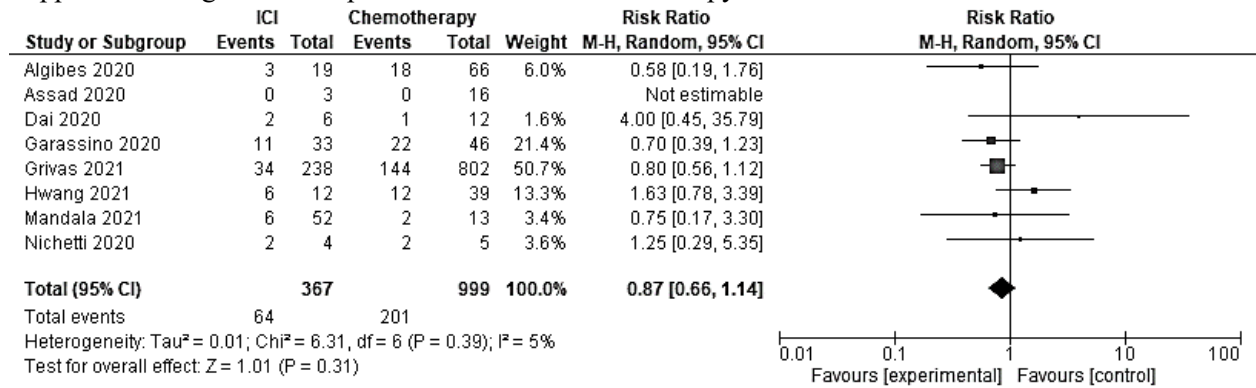

ICI= immune checkpoint inhibitor

## Appendix 1

### *Case reports description*

- 1. Buyanski *et al.*** reported the case of a 62-year-old patient with poorly differentiated squamous cell carcinoma of unknown primary origin with lymph node metastases and peritoneal carcinomatosis. He was treated with durvalumab (1,500 mg monthly) since 2017. The patient presented a bullous pemphigoid-like eruption and the immunotherapy was discontinued. In 2020 the patient restarted durvalumab. Three weeks after restarting the treatment, the patient was admitted to the hospital for COVID-19. During the hospital stay, the patient developed severe rapidly progressive acute kidney injury with refractory hyperkalemia requiring hemodialysis. Biopsy of the kidney showed severe acute tubulointerstitial nephritis. Prednisone was started and kidney function was recovered. One explanation is and immune regulation dysfunction produced by SARS-CoV-2 exaggerated by the treatment with anti-PD-L1.
- 2. Ramos-Ruperto *et al.*** reported the case of a 76-year-old man under treatment with pembrolizumab for lung cancer. He was admitted to the hospital for fever and dyspnea and oxygen saturation lower than 90%. He was diagnosed with COVID-19. After 10 days of respiratory support, the patient was discharged after improvement of fever and oxygenation. Two weeks after discharge the patient returned to the hospital because of daily fever. Blood cultures and viral serology were negative. He evolved with pancytopenia, organomegaly, and elevation of cytokines and ferritin. The diagnosis was hemophagocytic lymphohistiocytosis and high-dose immunoglobulins were started. The patient improved and discharged from the hospital. The hypothesis was that treatment with anti-PD-1 contributed to hemophagocytic lymphohistiocytosis (HLH) in the of context of SARS-CoV-2 infection. HLH related to ICI occur in 0.06% of patients.
- 3. Rolfo *et al.*** published 2 case reports of patients with lung cancer treated with ICI who developed atypical skin manifestations. The first case report is a 62-year-old man with stage IV squamous cell lung cancer treated with combination of nivolumab + ipilimumab. He was diagnosed with symptomatic mild COVID-19. The patient developed urticarial popular lesions with minimal erythema located in the lower dorsal, lumbar and gluteal region. Besides, the patient had a burning sensation in the skin and severe joint pain

with reactive polyarthritis. Corticosteroids were administered and the patient improved the symptoms. The second case was a 58-year-old woman with lung adenocarcinoma treated with chemotherapy + pembrolizumab. The patients presented with respiratory symptoms and was diagnosed with COVID-19. After 48 hours, the patient developed several lesions with targetoid appearance and late-onset painful oral ulcers. The biopsy of skin lesions was consisted with erythema multiforme. The symptoms were controlled with corticosteroids and antihistamines.

4. **Serra-Garcia *et al.*** reported the case of a 48-year-old woman with history of unresectable facial basal cell carcinoma treated with cemiplimab. She presented at the emergency department with painful digital distal ulcers without any COVID-19 respiratory symptoms. He had necrotic scar and bullae formation on the second, third, and fourth fingertips of the right hand and erythema with a necrotic scar on the fifth fingertip of the left hand. RT-PCR was positive for COVID-19. The lesions worsened to fingertip ischemia and the ICI was stopped. The patient was admitted and received alprostadil. After 1 week the patient improved the lesions and was discharged. It is hypothesized that in this patient with cemiplimab therapy, COVID-19 immune dysregulation could have triggered sever ischemia lesions
